# Supplementary material for: Structures of polynuclear complexes of palladium(ii) and platinum(ii) formed by slow hydrolysis in acidic aqueous solution
Source: Royal Society of Chemistry journal article supplement (doi:10.1039/c3dt32859g), 2013-01-01

## **Structures of Oxo-bridged Nanoparticles of Palladium(II) and Platinum(II) Formed by Slow Hydrolysis of the Aqua Ions in Acidic Aqueous Solution**

Natallia Torapava,<sup>a</sup> Lars I. Elding,<sup>b</sup> Hugo Mändar,<sup>c</sup> Kaspar Roosalu,<sup>c</sup> and Ingmar Persson<sup>a,\*</sup>

<sup>a</sup> Department of Chemistry, Swedish University of Agricultural Sciences, P.O.Box 7015,  
SE-750 07 Uppsala, Sweden

<sup>b</sup> Department of Chemistry, Chemical Center, Lund University, P.O. Box 124, SE-221 00  
Lund, Sweden.

<sup>c</sup> Institute of Physics, University of Tartu, 4 Tehä Str., EST-51010 Tartu, Estonia.

### **Supporting Material**

**Table S1.** Number of Pd...Pd distances per Pd in particles growing in the direction of the a/b and c direction of the unit cell of solid palladium(II) oxide.

*Growth in a or b direction of the unit cell*

| No. unit cells | No. of Pd atoms | No. Pd...Pd at 3.03 Å/Pd | No. Pd...Pd at 3.42 Å/Pd |
|----------------|-----------------|--------------------------|--------------------------|
| 1              | 6               | 1.0                      | 2.7                      |
| 2              | 10              | 2.4                      | 3.2                      |
| 3              | 14              | 2.7                      | 3.4                      |
| 4              | 18              | 2.9                      | 3.6                      |
| 5              | 22              | 3.0                      | 3.6                      |
| 6              | 26              | 3.1                      | 3.7                      |

*Growth in c direction of the unit cell*

| No. unit cells | No. of Pd atoms | No. Pd...Pd at 3.03 Å/Pd | No. Pd...Pd at 3.42 Å/Pd |
|----------------|-----------------|--------------------------|--------------------------|
| 1              | 6               | 1.0                      | 2.7                      |
| 2              | 10              | 1.0                      | 3.2                      |
| 3              | 14              | 1.0                      | 4.0                      |
| 4              | 18              | 1.0                      | 4.4                      |
| 5              | 22              | 1.0                      | 4.7                      |
| 6              | 26              | 1.0                      | 4.9                      |

**Figure S1.** UV-vis spectra of hydrolysed palladium(II) and platinum(II) tetra aqua solutions, aged for ca 15 years (conditions in Experimental).

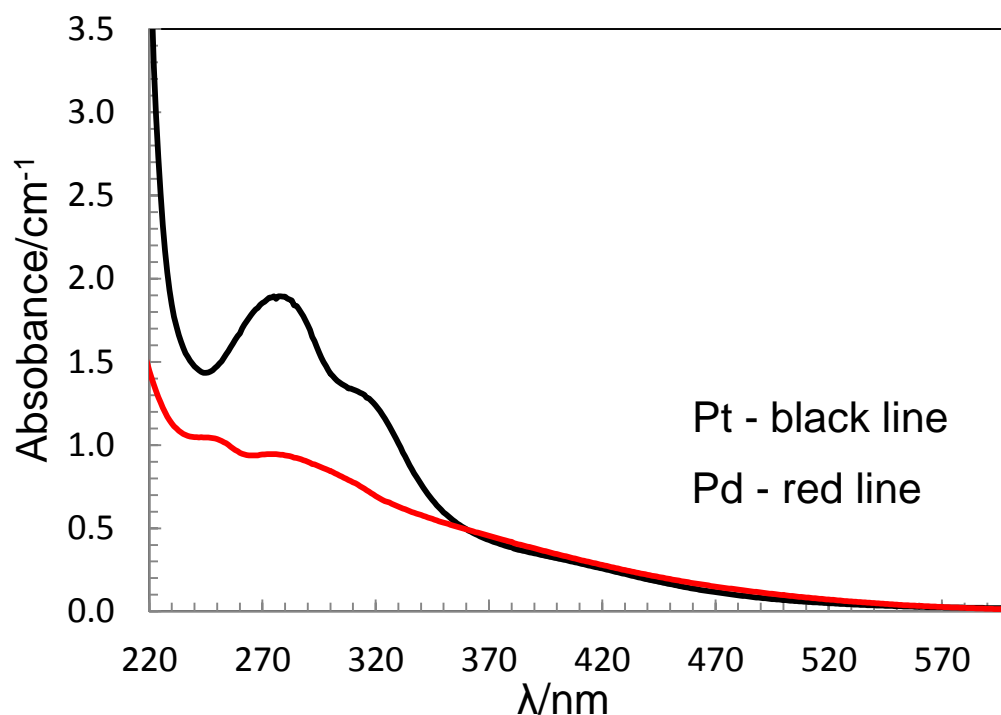

Supplement: c3dt32859g.pdf [file c3dt32859g.pdf]
